# Supplementary material for: Interstitial telomere sequences disrupt break-induced replication and drive formation of ectopic telomeres
Source: PubMed Central journal article supplement — Nucleic Acids Res. 2020 Dec 2;48(22):12697–710. doi: 10.1093/nar/gkaa1081 (PMC7736798; doi:10.1093/nar/gkaa1081), 2020-12-02
Supplement: gkaa1081_supplemental_file.pdf [file gkaa1081_supplemental_file.pdf]

**Table S1. Yeast strain list**

| <b>Description</b>                           | <b>Number</b> | <b>Genotype</b>                                                                                                                          |
|----------------------------------------------|---------------|------------------------------------------------------------------------------------------------------------------------------------------|
| <b>Parent BIR strain<sup>1</sup></b>         | LSY3881       | <i>MATa-inc lys2::LEU2 hml::oriPRS hmr::ampR AVT2::lys-HOCs::KanMX6 ade3::GAL-HO PTK1::TRP1-ys2</i> (Chr XI 70 kb donor)                 |
| <b>BIR strain + ITS</b>                      | LSY3944       | <i>MATa-inc lys2::LEU2 hml::oriPRS hmr::ampR AVT2::lys-HOCs::KanMX6 ade3::GAL-HO PTK1::TRP1-ys2 ITS-URA3</i>                             |
| <b>BIR strain - ITS</b>                      | LSY3945       | <i>MATa-inc lys2::LEU2 hml::oriPRS hmr::ampR AVT2::lys-HOCs::KanMX6 ade3::GAL-HO PTK1::TRP1-ys2 URA3</i>                                 |
| <b>BIR strain + ITS (48 kb)</b>              | LSY4096       | <i>MATa-inc lys2::LEU2 hml::oriPRS hmr::ampR AVT2::lys-HOCs::KanMX6 ade3::GAL-HO PTK1::TRP1-ys2 ITS-URA3 (48 kb)</i>                     |
| <b>BIR strain - ITS (48 kb)</b>              | LSY4097       | <i>MATa-inc lys2::LEU2 hml::oriPRS hmr::ampR AVT2::lys-HOCs::KanMX6 ade3::GAL-HO PTK1::TRP1-ys2 URA3 (48 kb)</i>                         |
| <b><i>pif1-m2</i></b>                        | W3819-4C      | <i>MAT<math>\alpha</math> pif1-m2</i>                                                                                                    |
| <b><i>pif1-m2</i> + ITS</b>                  | LSY3989-42    | <i>MATa-inc lys2::LEU2 hml::oriPRS hmr::ampR AVT2::lys-HOCs::KanMX6 ade3::GAL-HO PTK1::TRP1-ys2 ITS-URA3 pif1-m2</i>                     |
| <b><i>pif1-m2</i> - ITS</b>                  | LSY3989-52    | <i>MATa-inc lys2::LEU2 hml::oriPRS hmr::ampR AVT2::lys-HOCs::KanMX6 ade3::GAL-HO PTK1::TRP1-ys2 URA3 pif1-m2</i>                         |
| <b><i>mph1<math>\Delta</math></i> + ITS</b>  | LSY4146       | <i>MATa-inc lys2::LEU2 hml::oriPRS hmr::ampR AVT2::lys-HOCs::KanMX6 ade3::GAL-HO PTK1::TRP1-ys2 ITS-URA3 mph1::HphMX</i>                 |
| <b><i>mph1<math>\Delta</math></i> - ITS</b>  | LSY4145       | <i>MATa-inc lys2::LEU2 hml::oriPRS hmr::ampR AVT2::lys-HOCs::KanMX6 ade3::GAL-HO PTK1::TRP1-ys2 URA3 mph1::HphMX</i>                     |
| <b><i>sgs1<math>\Delta</math></i> + ITS</b>  | LSY4628       | <i>MATa-inc lys2::LEU2 hml::oriPRS hmr::ampR AVT2::lys-HOCs::KanMX6 ade3::GAL-HO PTK1::TRP1-ys2 ITS-URA3 sgs1::HphMX</i>                 |
| <b><i>tlc1<math>\Delta</math></i> + ITS</b>  | LSY4155       | <i>MATa-inc lys2::LEU2 hml::oriPRS hmr::ampR AVT2::lys-HOCs::KanMX6 ade3::GAL-HO PTK1::TRP1-ys2 ITS-URA3 tlc1::HphMX</i>                 |
| <b><i>tlc1<math>\Delta</math></i> - ITS</b>  | LSY4156       | <i>MATa-inc lys2::LEU2 hml::oriPRS hmr::ampR AVT2::lys-HOCs::KanMX6 ade3::GAL-HO PTK1::TRP1-ys2 URA3 tlc1::HphMX</i>                     |
| <b><i>TetO-TLC1</i></b>                      | yT529         | <i>MAT<math>\alpha</math> ADE2 tlc::HIS3MX6-PrTetO2-TLC1 cdc10::CDC10-mCherry-KanMX</i>                                                  |
| <b><i>TetO-TLC1</i> + ITS</b>                | LSY4629-23C   | <i>MATa-inc lys2::LEU2 hml::oriPRS hmr::ampR AVT2::lys-HOCs::KanMX6 ade3::GAL-HO PTK1::TRP1-ys2 ITS-URA3 tlc1::HIS3MX6-Pr-TetO2-TLC1</i> |
| <b>BIR strain with Y' element</b>            | LSY4318       | <i>MATa-inc lys2::LEU2 hml::oriPRS hmr::ampR AVT2::lys-HOCs::KanMX6 ade3::GAL-HO PTK1::TRP1-ys2 Y'element4-URA3</i>                      |
| <b>BIR strain with (GT)<sub>32</sub></b>     | LSY4425       | <i>MATa-inc lys2::LEU2 hml::oriPRS hmr::ampR AVT2::lys-HOCs::KanMX6 ade3::GAL-HO PTK1::TRP1-ys2 (GT)<sub>32</sub>-URA3</i>               |
| <b><i>pol32<math>\Delta</math></i> + ITS</b> | LSY4314       | <i>MATa-inc lys2::LEU2 hml::oriPRS hmr::ampR AVT2::lys-HOCs::KanMX6 ade3::GAL-HO PTK1::TRP1-ys2 ITS-URA3</i>                             |

|                                           |         |                                                                                                                                         |
|-------------------------------------------|---------|-----------------------------------------------------------------------------------------------------------------------------------------|
|                                           |         | <i>pol32::HphMX</i>                                                                                                                     |
| <b><i>pol32Δ</i> - ITS</b>                | LSY4315 | <i>MATa-inc lys2::LEU2 hml::oriPRS hmr::ampR AVT2::lys-HOcs::KanMX6 ade3::GAL-HO PTK1::TRP1-ys2 URA3, pol32::HphMX</i>                  |
| <b><i>pol32Δ</i> + (GT)<sub>32</sub></b>  | LSY4452 | <i>MATa-inc lys2::LEU2 hml::oriPRS hmr::ampR AVT2::lys-HOcs::KanMX6 ade3::GAL-HO PTK1::TRP1-ys2 (GT)<sub>32</sub>-URA3 pol32::HphMX</i> |
| <b><i>pol32Δ</i> + Y' element</b>         | LSY4453 | <i>MATa-inc lys2::LEU2 hml::oriPRS hmr::ampR AVT2::lys-HOcs::KanMX6 ade3::GAL-HO PTK1::TRP1-ys2 Y' element-URA3 pol32::HphMX</i>        |
| <b><i>pif1-m2</i> + (GT)<sub>32</sub></b> | LSY4427 | <i>MATa-inc lys2::LEU2 hml::oriPRS hmr::ampR AVT2::lys-HOcs::KanMX6 ade3::GAL-HO PTK1::TRP1-ys2 (GT)<sub>32</sub>-URA3 pif1-m2</i>      |
| <b><i>pif1-m2</i> + Y' element</b>        | LSY4428 | <i>MATa-inc lys2::LEU2 hml::oriPRS hmr::ampR AVT2::lys-HOcs::KanMX6 ade3::GAL-HO PTK1::TRP1-ys2 Y' element-URA3 pif1-m2</i>             |
| <b><i>pif1-m2, tlc1Δ</i> +ITS</b>         | LSY4426 | <i>MATa-inc lys2::LEU2 hml::oriPRS hmr::ampR AVT2::lys-HOcs::KanMX6 ade3::GAL-HO PTK1::TRP1-ys2 ITS-URA3 tlc1::HphMX pif1-m2</i>        |
| <b><i>rad10Δ</i> + ITS</b>                | LSY4203 | <i>MATa-inc lys2::LEU2 hml::oriPRS hmr::ampR AVT2::lys-HOcs::KanMX6 ade3::GAL-HO PTK1::TRP1-ys2 ITS-URA3 rad10::HphMX</i>               |
| <b><i>rad10Δ</i> - ITS</b>                | LSY4202 | <i>MATa-inc lys2::LEU2 hml::oriPRS hmr::ampR AVT2::lys-HOcs::KanMX6 ade3::GAL-HO PTK1::TRP1-ys2 URA3 rad10::HphMX</i>                   |

<sup>1</sup>All strains are in the W303 background (*leu2-3,112 trp1-1 can1 ura3-1 ade2-1 his3-11,15 RAD5*), only differences from this genotype are listed above.



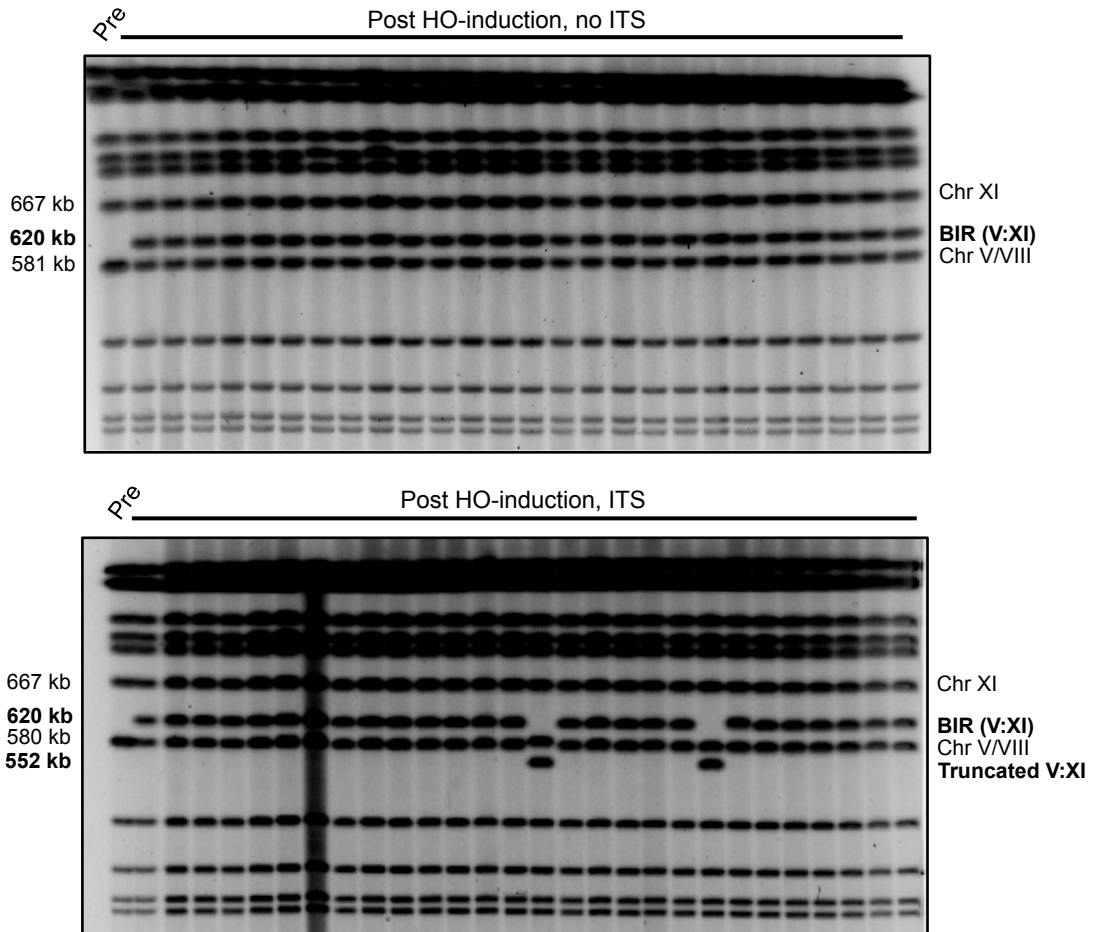

**Figure S1. Identification of truncated chromosomes by PFGE.** Representative pulsed-field gels showing chromosome sizes pre-HO induction and of independent clones after HO induction strains without or with the ITS.



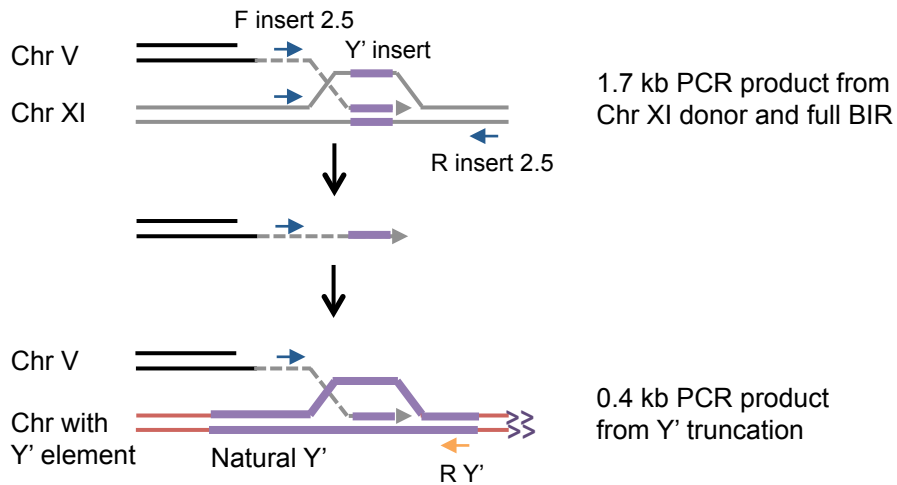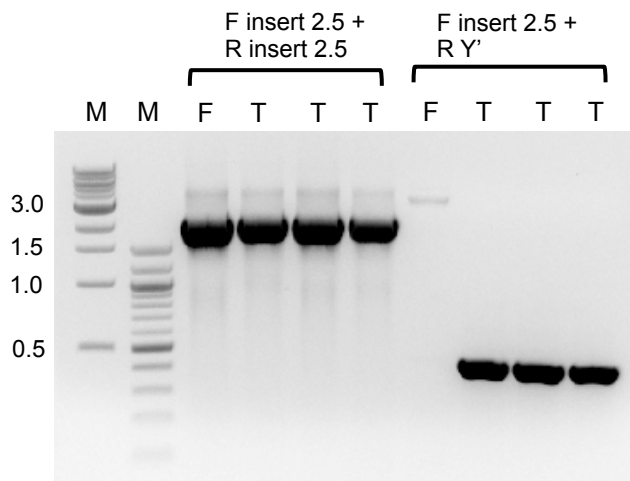

**Figure S3. Y' truncated chromosomes result from HR.** DNA extracted from Full BIR (F) or Truncated BIR (T) products was PCR amplified with F insert 2.5 and R insert 2.5 primers, which amplify the Y' insert and *URA3* present on the Chr XI donor and Full BIR product, or with F insert 2.5 + R Y' primers to detect truncations resulting from HR between the Y' insert and full-length Y' element present at many yeast telomeres. The image shows 3 truncations of 10 total tested by PCR. M refers to 1 kb and 0.1 kb size markers.
